# Supplementary material for: Template-assisted self-assembly of diblock copolymer micelles for non-hexagonal arrays of Au nanoparticles
Source: Royal Society of Chemistry journal article supplement (doi:10.1039/c6ra05530c), 2016-01-01
Supplement: c6ra05530c1.pdf [file c6ra05530c1.pdf]

Electronic Supplementary Material

**Template-Assisted Self-Assembly of Diblock Copolymer  
Micelles for Non-Hexagonal Arrays of Au Nanoparticles**

*Sung-Soo Kim, and Byeong-Hyeok Sohn\**

Department of Chemistry, Seoul National University, Seoul 08826, Republic of Korea

\* E-mail: [bhsohn@snu.ac.kr](mailto:bhsohn@snu.ac.kr)

## 1. Single-layered films of the PS-P4VP micelles

For transmission electron microscopy (TEM), copolymer films were spin-coated onto freshly-cleaved mica substrates, which were delaminated and floated off onto deionized water. The films were subsequently transferred onto carbon-coated TEM grids, followed by selective staining of P4VP cores by  $I_2$ . Then, TEM was performed on a Hitachi 7600 operating at 100 kV. Since P4VP cores were selectively stained, they appeared dark dots in TEM images (Fig. S1d~f) and showed a close-packed order without overlapping. The spacing in the TEM image was similar to that measured in the AFM image (Fig. S1a~c). If there are more than a single layer of micelles in the film, dark dots of the P4VP cores would be overlapped in through-view TEM images. Since we did not observe such overlap in TEM images (Fig. S1d~f), we concluded that each film consists of a single layer of micelles.

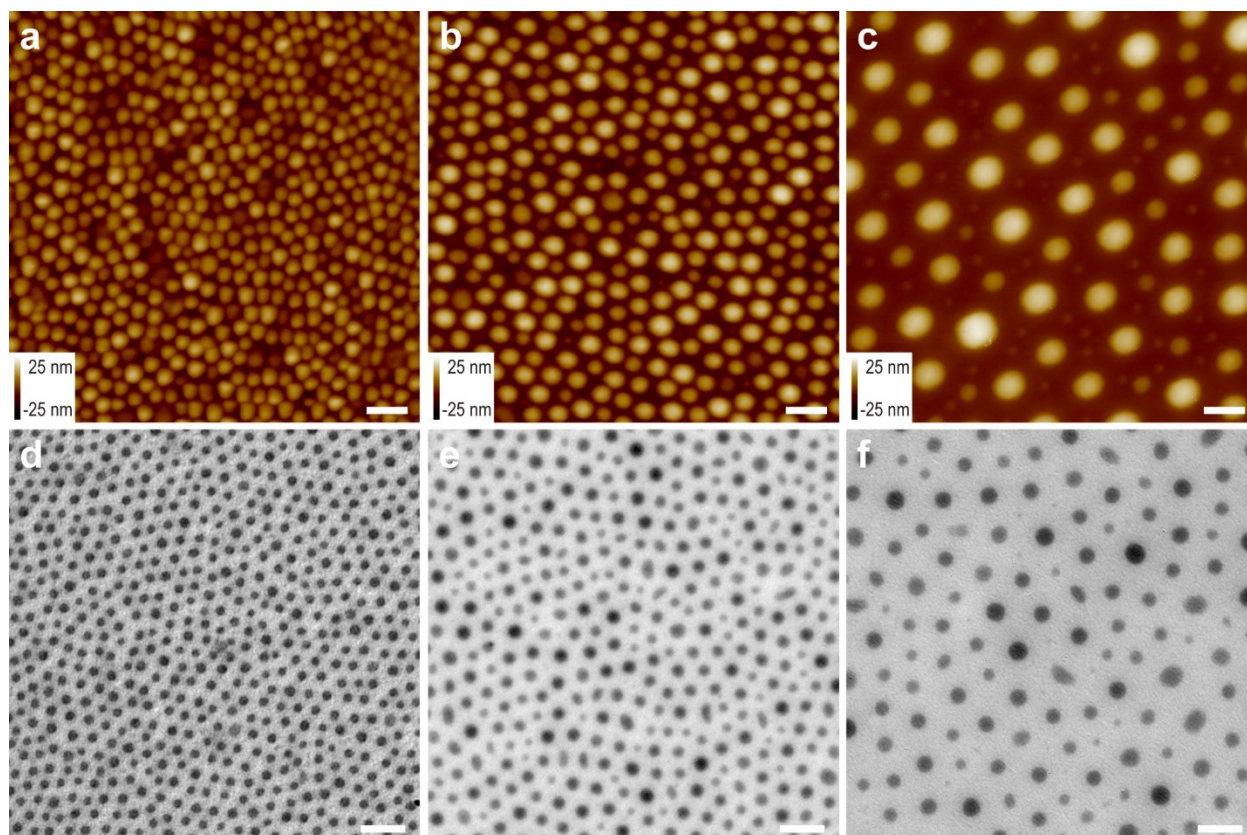

**Fig. S1.** AFM and TEM images of PS-P4VP micellar films: (a,d) PS(32)-P4VP(13); (b,e) PS(51)-P4VP(18); (c,f) PS(109)-P4VP(27). Scale bars are 100 nm.

## 2. Fabrication of the TiO<sub>2</sub> nanotemplates

Fig. S2a shows the AFM image of polymeric nanogroove structures, which was fabricated from the thin film of PS(80)-PMMA(80) with perpendicularly-oriented lamellar structures. The selective removal of the PMMA microdomains resulted in a fingerprint-like topographic pattern of the cross-linked PS nanogrooves with the height of ~69 nm (bright lines in AFM image of Fig. S2a). The spacing between nanogrooves (~77 nm) was calculated by performing spectral density analysis on the corresponding AFM image. These PS nanogrooves were utilized as a mold to produce nanogroove TiO<sub>2</sub> template (bright lines in AFM image of Fig. S2c). The spacing of the TiO<sub>2</sub> nanogrooves (~77 nm) is equal to that of the original PS nanogrooves, and the height of the TiO<sub>2</sub> nanogrooves (~37 nm), which is appropriate to guide the arrangement of the micelles in the templates, is smaller than that of the PS nanogrooves due to the loss during the reactive ion etching process for the removal of the over-coated TiO<sub>2</sub> layer. Fig. S2b shows the AFM image of nanoporous structures fabricated from PS(140)-PMMA(60). After the selective removal of the PMMA microdomains, we were able to discover hexagonal arrays of nanopores (dark pores in AFM image of Fig. S2b). The depth of the nanopores was ~51 nm. The same TiO<sub>2</sub> fabrication process was applied to PS nanoporous structures to yield nanodisc TiO<sub>2</sub> template (bright discs in AFM image of Fig. S2d). The spacing of the TiO<sub>2</sub> nanodiscs (~67 nm) is similar to that of the original PS nanoporous film. Again, CF<sub>4</sub> reactive ion etching led to the reduction of the height of the TiO<sub>2</sub> nanodiscs (~28 nm), which is less than that of the PS nanoporous structures.

In addition, we measured the diameter and spacing of the PS nanopores and the TiO<sub>2</sub> nanodiscs from FE-SEM images in Fig. S3 because of the distortion of the lateral size in the AFM measurement (Fig. S2b and S2d). The diameter and spacing are ~39 nm and ~60 nm, respectively. Hence, we confirmed that the final morphology and physical dimension of TiO<sub>2</sub> nanotemplates can be effectively controlled by polymeric nanostructures produced from the self-assembled thin films of diblock copolymers.

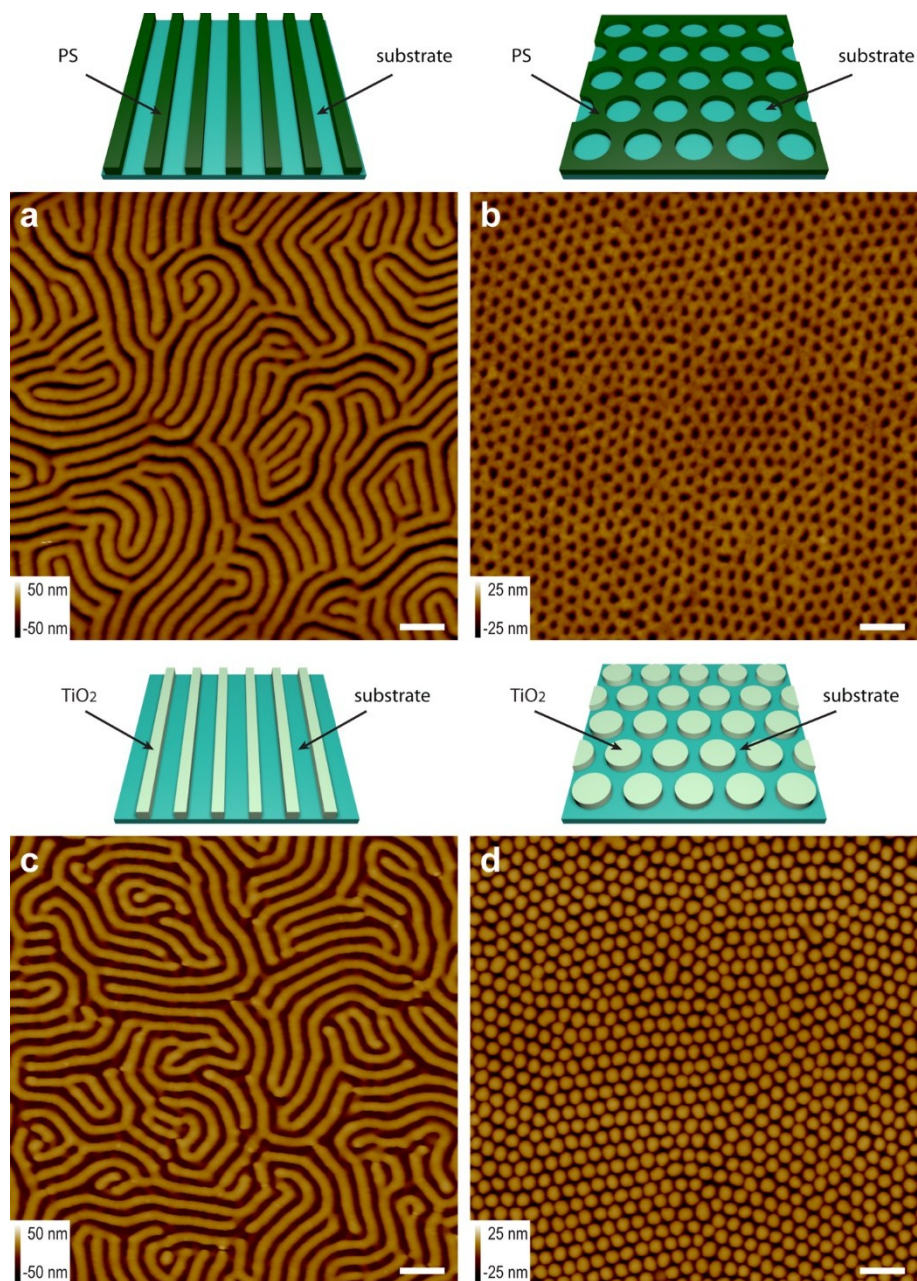

**Fig. S2.** AFM images of (a) PS nanogroove template from PS(80)-PMMA(80); (b) PS nanoporous template from PS(140)-PMMA(60); (c) TiO<sub>2</sub> nanogroove template; (d) TiO<sub>2</sub> nanodisc template. Schematic illustrations are depicted on the corresponding micrographs. Scale bars are 200 nm.

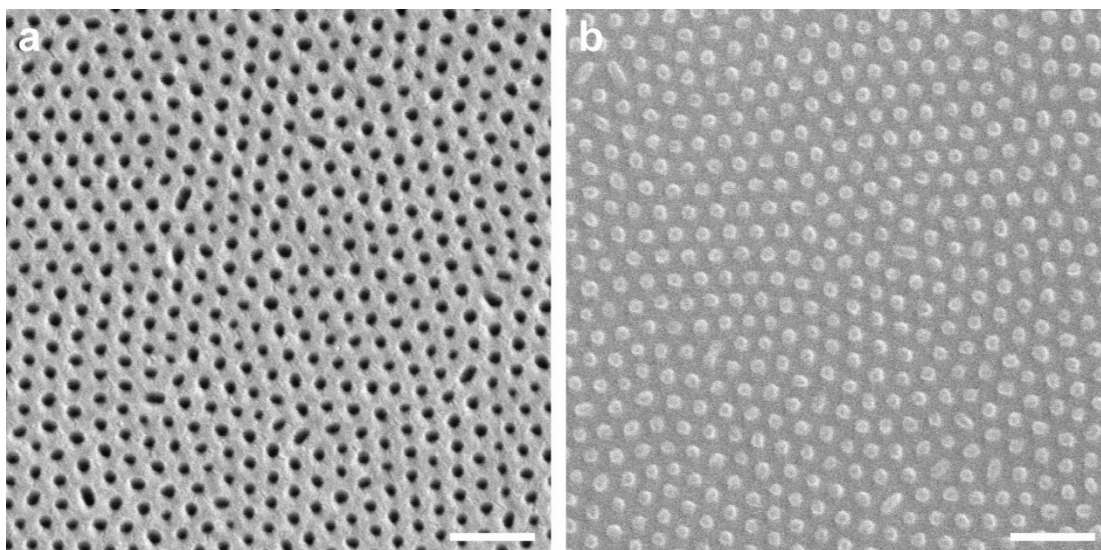

**Fig. S3.** FE-SEM images of (a) the PS nanopores template and (b) the TiO<sub>2</sub> nanodiscs. Scale bars are 200 nm.

### 3. AFM images of PS(109)-P4VP(27) micelles spin-coated onto the TiO<sub>2</sub> templates

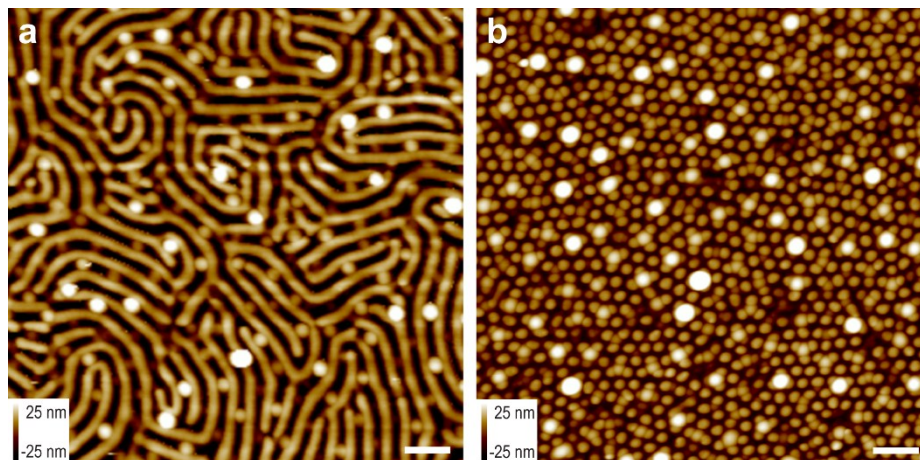

**Fig. S4.** AFM images of PS(109)-P4VP(27) micelles spin-coated onto (a) the TiO<sub>2</sub> nanogrooves; (b) the TiO<sub>2</sub> nanodiscs. Scale bars are 200 nm.
